# Supplementary material for: Implementing genomic screening in diverse populations
Source: bioRxiv or medRxiv preprint supplement (doi:10.1101/2021.01.04.21249213), 2021-01-06
Supplement: Supplementary file [file media-1.pdf]

## ADDITIONAL FILE 1

### Implementing genomic screening in diverse populations

Noura S. Abul-Husn<sup>1,2,3</sup>, Emily R. Soper<sup>1,2</sup>, Giovanna T. Braganza<sup>1</sup>, Jessica E. Rodriguez<sup>1</sup>, Natasha Zeid<sup>4</sup>, Sinead Cullina<sup>1</sup>, Dean Bobo<sup>1</sup>, Arden Moscati<sup>1,5</sup>, Amanda Merkelson<sup>5</sup>, Ruth J.F. Loos<sup>5</sup>, Judy H. Cho<sup>2,3,5</sup>, Gillian M. Belbin<sup>1,2</sup>, Sabrina A. Suckiel<sup>1,2</sup>, Eimear E. Kenny<sup>1,2,3</sup>

<sup>1</sup>The Institute for Genomic Health, Icahn School of Medicine at Mount Sinai, New York, NY

<sup>2</sup>Department of Medicine, Icahn School of Medicine at Mount Sinai, New York, NY

<sup>3</sup>Department of Genetics and Genomic Sciences, Icahn School of Medicine at Mount Sinai, New York, NY

<sup>4</sup>GeneDx

<sup>5</sup>The Charles Bronfman Institute for Personalized Medicine, Icahn School of Medicine at Mount Sinai, New York, NY

#### Corresponding Author:

Noura S. Abul-Husn, M.D., Ph.D.  
Icahn School of Medicine at Mount Sinai  
One Gustave L. Levy Place, Box 1003  
New York, NY 10029  
Telephone: 212-241-3853  
Fax: 212-849-2643  
Email: [noura.abul-husn@mssm.edu](mailto:noura.abul-husn@mssm.edu)

### Supplementary Tables:

1. **Table S1.** Questions from a return of genomic results preference survey administered to previously enrolled BioMe Biobank participants.
2. **Table S2.** Demographic characteristics of BioMe participants who were respondents of a return of genomic results preference survey (N = 72), and characteristics of all adult BioMe participants enrolled at the time of the survey (N = 31,213).
3. **Table S3.** Clinically confirmed pathogenic, likely pathogenic, and downgraded variants in a pilot genomic screening program.

### Supplementary Figures:

1. **Fig. S1. A model for returning genomic results to biobank research participants without prior knowledge of genomic risk.** After genomics-first identification of variant positive individuals, they receive genetic counseling and are then referred to specialty provider(s) for further evaluation and initiation of risk management.
2. **Fig. S2. Pre-pilot survey to understand BioMe participants' (N = 72) preferences regarding the hypothetical return of results.** **A)** Decision to enroll into biobank research if the program returned genomic results. **B)** Selected reasons for receiving or not receiving genomic results. **C)** Selected categories of genomic results participants would want to receive.

**Table S1.** Questions from a return of genomic results preference survey administered to previously enrolled BioMe Biobank participants.

| Question                                                                                                                                                                                        | Answer options                                                                                                                                                                                                                                                                                                                                                                                                                                                                                                                                                        |
|-------------------------------------------------------------------------------------------------------------------------------------------------------------------------------------------------|-----------------------------------------------------------------------------------------------------------------------------------------------------------------------------------------------------------------------------------------------------------------------------------------------------------------------------------------------------------------------------------------------------------------------------------------------------------------------------------------------------------------------------------------------------------------------|
| If, during your enrollment in <i>BioMe</i> , the recruiter told you that you <b>COULD</b> receive genetic research results from your participation, do you think you still would have enrolled? | <ul style="list-style-type: none"> <li>• Definitely yes</li> <li>• Probably yes</li> <li>• Not sure</li> <li>• Probably not</li> <li>• Definitely not</li> </ul>                                                                                                                                                                                                                                                                                                                                                                                                      |
| What do you think are good reasons to receive genetic research results? (Check all that apply)                                                                                                  | <ul style="list-style-type: none"> <li>• To help myself (for example, by finding out what diseases I am at risk for)</li> <li>• To help my family (for example, by finding out what diseases could run in the family)</li> <li>• To help me make decisions about having children (for example, by finding out what diseases could be passed on to them)</li> <li>• I feel ownership of my genetic research results</li> <li>• Other (please specify)</li> </ul>                                                                                                       |
| What do you think are good reasons <b>NOT</b> to receive genetic research results? (Check all that apply)                                                                                       | <ul style="list-style-type: none"> <li>• Concerns about my privacy</li> <li>• Concerns about discrimination (health insurance, life insurance, employment, or other)</li> <li>• Cannot make health changes based on genetic research results</li> <li>• Receiving genetic research results would cause me or my family anxiety</li> <li>• Other (please specify)</li> </ul>                                                                                                                                                                                           |
| If given the choice, what type of genetic research results would you want to receive?                                                                                                           | <ul style="list-style-type: none"> <li>• Only genetic research results that the researcher thinks are important</li> <li>• Only genetic research results about specific diseases that I think are important</li> <li>• Only genetic research results about specific diseases that experts in genetics think are important and should be received by everyone</li> <li>• All genetic research results, including those that are uncertain and/or cannot be interpreted at the moment</li> <li>• None (I would not want to receive genetic research results)</li> </ul> |
| If you were to receive genetic research results, how would you want to be informed?                                                                                                             | <ul style="list-style-type: none"> <li>• By phone</li> <li>• By a letter in the mail</li> <li>• In person</li> <li>• Not applicable (I would not want to receive genetic research results)</li> </ul>                                                                                                                                                                                                                                                                                                                                                                 |
| If you were to receive genetic research results, who would you want to inform you?                                                                                                              | <ul style="list-style-type: none"> <li>• My primary care doctor that I see regularly for my healthcare</li> <li>• A genetic counselor (a health professional trained in genetic diseases, particularly in returning and discussing implications of genetic testing results)</li> <li>• A medical geneticist (a doctor who is specially trained in diagnosing and treating genetic diseases)</li> <li>• A <i>BioMe</i> Biobank researcher or research coordinator</li> <li>• Not applicable (I would not want to receive genetic research results)</li> </ul>          |

**Table S2.** Demographic characteristics of BioMe participants who were respondents of a return of genomic results preference survey (N = 72), and characteristics of all adult BioMe participants enrolled at the time of the survey (N = 31,213).

| Demographic characteristics<br>(number of survey respondents) | Survey respondents<br>N (%) | BioMe participants<br>N (%) | Chi-squared<br>P value |
|---------------------------------------------------------------|-----------------------------|-----------------------------|------------------------|
| Female (72)                                                   | 43 (59.7)                   | 18449 (59.1)                | 0.9                    |
| Age range (72)                                                |                             |                             | <0.0001                |
| 18 to 30 years                                                | 27 (37.5)                   | 2149 (6.9)                  |                        |
| 31 to 50 years                                                | 16 (22.2)                   | 8823 (28.3)                 |                        |
| 51 to 70 years                                                | 26 (36.1)                   | 13538 (43.4)                |                        |
| 71 years and over                                             | 3 (4.2)                     | 6703 (21.5)                 |                        |
| Born in the U.S. (71)                                         | 62 (87.3)                   | 19692 (63.1)                | <0.0001                |
| Self-reported ancestry (72)                                   |                             |                             | 0.07                   |
| African American/African                                      | 9 (12.5)                    | 7670 (24.6)                 |                        |
| East/Southeast Asian                                          | 2 (2.8)                     | 866 (2.8)                   |                        |
| Hispanic/Latinx                                               | 24 (33.3)                   | 11072 (35.5)                |                        |
| European                                                      | 30 (41.7)                   | 9459 (30.3)                 |                        |
| Native American, Other, or Multiple Selected                  | 7 (9.7)                     | 2146 (6.9)                  |                        |
| Jewish (70)                                                   | 20 (28.6)                   | -                           | -                      |
| Identify as religious (69)                                    | 39 (56.5)                   | -                           | -                      |
| Have children (70)                                            | 26 (37.1)                   | -                           | -                      |
| Highest level of school completed or highest degree (70)      |                             | -                           | -                      |
| Less than high school degree                                  | 1 (1.4)                     |                             |                        |
| High school degree or equivalent (e.g. GED)                   | 4 (5.7)                     |                             |                        |
| Some college but no degree                                    | 16 (22.9)                   |                             |                        |
| Associate degree                                              | 4 (5.7)                     |                             |                        |
| Bachelor degree                                               | 26 (37.1)                   |                             |                        |
| Graduate degree                                               | 19 (27.1)                   |                             |                        |
| Average household income (66)                                 |                             | -                           | -                      |
| Less than \$20,000                                            | 9 (13.6)                    |                             |                        |
| \$20,000-\$39,000                                             | 6 (9.1)                     |                             |                        |
| \$40,000-\$59,000                                             | 14 (21.2)                   |                             |                        |
| \$60,000-\$79,000                                             | 9 (13.6)                    |                             |                        |
| \$80,000-\$149,000                                            | 10 (15.1)                   |                             |                        |
| \$150,000 or more                                             | 18 (27.2)                   |                             |                        |

**Table S3.** Clinically confirmed pathogenic, likely pathogenic, and downgraded variants in a pilot genomic screening program.<sup>a</sup>

| Gene  | CHR:POS:REF:ALT     | cDNA Position      | Protein Position | # Heterozygous Carriers | Interpretation          |
|-------|---------------------|--------------------|------------------|-------------------------|-------------------------|
| BRCA1 | 17:43057062:T:G     | c.5266dupC         | p.Gln1756fs      | 2                       | Pathogenic              |
|       | 17:43124027:ACT:A   | c.68_69delAG       | p.Glu23fs        | 4                       | Pathogenic              |
|       | 17:43094472:C:T     | c.1059G>A          | p.Trp353Ter      | 1                       | Pathogenic              |
|       | 17:43063917:A:C     | c.5109T>G          | p.Tyr1703Ter     | 1                       | Pathogenic              |
|       | 17:43049191:TG:T    | c.5335delC         | p.Gln1779fs      | 1                       | Pathogenic              |
|       | 17:43092615:TC:T    | c.2915delG         | p.Gly972fs       | 1                       | Pathogenic              |
|       | 17:43091455:T:TGC   | c.4074_4075dupGC   | p.Gln1359fs      | 1                       | Likely pathogenic       |
| BRCA2 | 13:32340128:C:T     | c.5773C>T          | p.Gln1925Ter     | 1                       | Pathogenic              |
|       | 13:32338277:G:T     | c.3922G>T          | p.Glu1308Ter     | 2                       | Pathogenic              |
|       | 13:32319298:G:T     | c.289G>T           | p.Glu97Ter       | 1                       | Pathogenic              |
|       | 13:32380085:C:T     | c.9196C>T          | p.Gln3066Ter     | 1                       | Pathogenic              |
|       | 13:32340300:GT:G    | c.5946delT         | p.Ser1982fs      | 3                       | Pathogenic              |
|       | 13:32336781:T:G     | c.2426T>G          | p.Leu809Ter      | 1                       | Pathogenic              |
|       | 13:32338783:CA:C    | c.4429delA         | p.Ile1477fs      | 1                       | Pathogenic              |
|       | 13:32370955:G:A     | c.8488-1G>A        |                  | 1                       | Pathogenic              |
|       | 13:32339489:G:T     | c.5134G>T          | p.Gly1712Ter     | 1                       | Pathogenic              |
|       | 13:32340836:GACAA:G | c.6486_6489delACAA | p.Lys2162fs      | 1                       | Pathogenic              |
|       | 13:32336684:G:GA    | c.2330dupA         | p.Asp777fs       | 1                       | Pathogenic              |
|       | 13:32333282:G:T     | c.1804G>T          | p.Gly602Ter      | 1                       | Pathogenic              |
| MLH1  | 3:37012098:C:T      | c.676C>T           | p.Arg226Ter      | 1                       | Pathogenic              |
| MSH6  | 2:47799823:TC:T     | c.1842delC         | p.Cys615fs       | 1                       | Pathogenic              |
| PMS2  | 7:6005918:C:A       | c.137G>T           | p.Ser46Ile       | 1                       | Pathogenic              |
|       | 7:5986838:G:A       | c.1927C>T          | p.Gln643Ter      | 1                       | Pathogenic              |
|       | 7:5986933:A:AT      | c.1831dupA         | p.Ile611fs       | 1                       | Pathogenic              |
|       | 7:6003793:C:A       | c.251-1G>T         |                  | 1                       | Likely pathogenic       |
| APOB  | 2:21006288:C:T      | c.10580G>A         | p.Arg3527Gln     | 1                       | Pathogenic              |
|       | 2:21002392:CAT:C    | c.13028_13029delAT | p.Tyr4343fs      | 2                       | Uncertain               |
|       | 2:21006128:G:C      | c.10740C>G         | p.Asn3580Lys     | 2                       | Uncertain               |
|       | 2:21005155:TG:T     | c.11712delC        | p.Asn3904Lysfs   | 1                       | Pathogenic <sup>b</sup> |
| LDLR  | 19:11116198:A:G     | c.1691A>G          | p.Asn564Ser      | 1                       | Likely pathogenic       |
|       | 19:11105441:G:A     | c.535G>A           | p.Glu179Lys      | 1                       | Likely pathogenic       |
|       | 19:11120143:C:T     | c.1897C>T          | p.Arg633Cys      | 1                       | Pathogenic              |
|       | 19:11123263:C:T     | c.2230C>T          | p.Arg744Ter      | 1                       | Pathogenic              |
|       | 19:11105567:G:A     | c.661G>A           | p.Asp221Asn      | 1                       | Pathogenic              |
|       | 19:11116153:G:A     | c.1646G>A          | p.Gly549Asp      | 1                       | Pathogenic              |
|       | 19:11113608:G:A     | c.1432G>A          | p.Gly478Arg      | 1                       | Likely pathogenic       |
|       | 19:11113343:G:A     | c.1252G>A          | p.Glu418Lys      | 1                       | Uncertain               |
|       | 19:11120106:G:T     | c.1860G>T          | p.Trp620Cys      | 1                       | Uncertain               |
|       | 19:11120188:T:G     | c.1942T>G          | p.Ser648Ala      | 2                       | Uncertain               |

|  |                 |           |             |    |            |
|--|-----------------|-----------|-------------|----|------------|
|  | 19:11131285:A:G | c.2552A>G | p.Gln851Arg | 1  | Uncertain  |
|  | 19:11105507:G:A | c.601G>A  | p.Glu201Lys | 1  | Uncertain  |
|  | 19:11105572:C:T | c.666C>T  | p.D222=     | 1  | Uncertain  |
|  | 18:31598655:G:A | c.424G>A  | p.Val142Ile | 31 | Pathogenic |
|  | 18:31592974:G:A | c.148G>A  | p.Val50Met  | 1  | Pathogenic |

<sup>a</sup>Only Pathogenic and Likely Pathogenic variants associated with conditions included in the pilot genomic screening program were disclosed to consenting participants.

<sup>b</sup>This *APOB* variant is associated with hypobetalipoproteinemia.

cDNA and protein position provided for NM\_007294.3 (*BRCA1*), NM\_000059.3 (*BRCA2*), NM\_000249.3 (*MLH1*), NM\_000179.2 (*MSH6*), NM\_000535.5 (*PMS2*), NM\_000384.2 (*APOB*), NM\_000527.4 (*LDLR*), and NM\_000371.3 (*TTR*); Human reference genome build 38 (GRCh38).

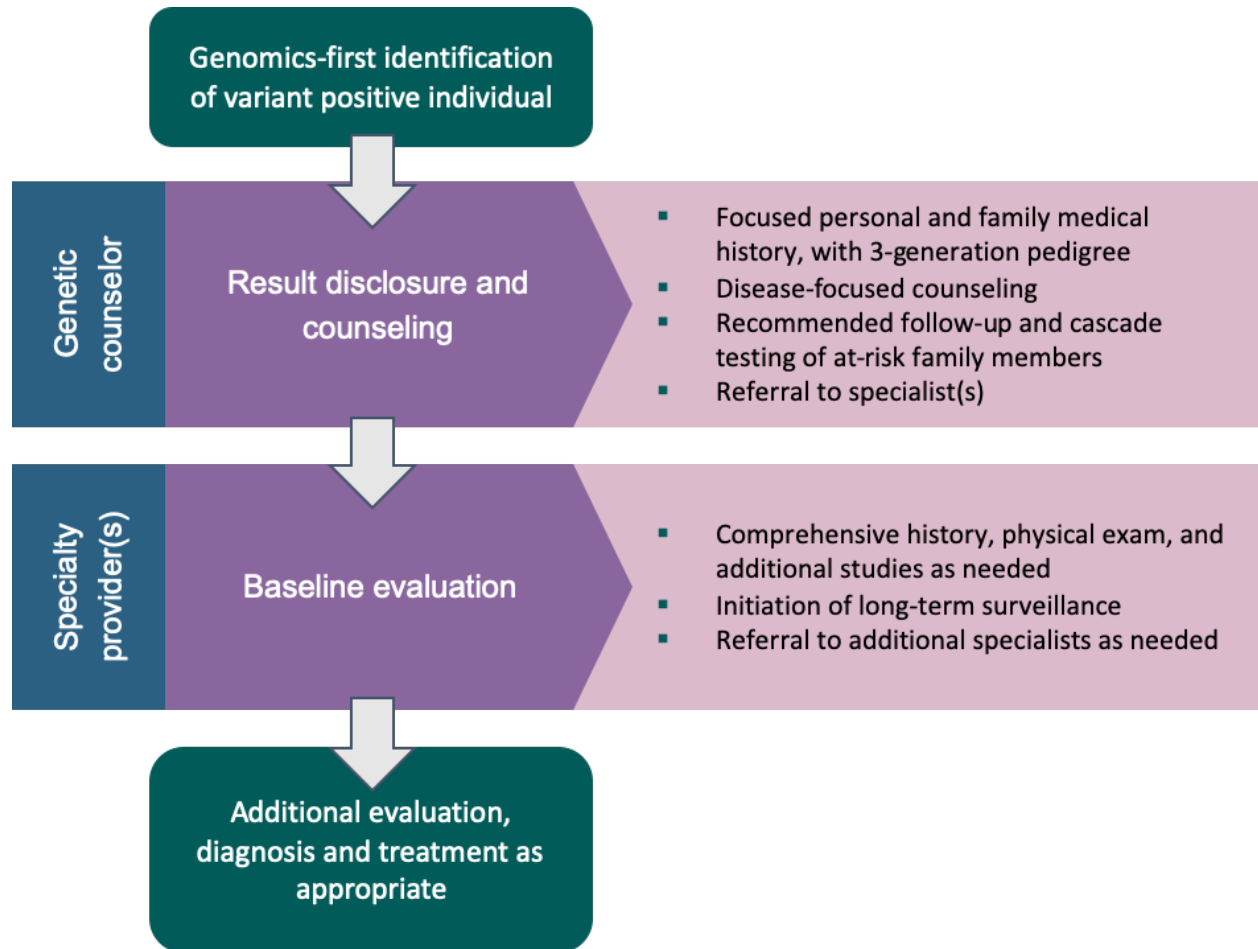

**Figure S1. A model for returning genomic results to biobank research participants without prior knowledge of genomic risk.** After genomics-first identification of variant positive individuals, they receive genetic counseling and are then referred to specialty provider(s) for further evaluation and initiation of risk management.

**A** If you had been told you could receive genomic results from BioMe, do you think you still would have enrolled?

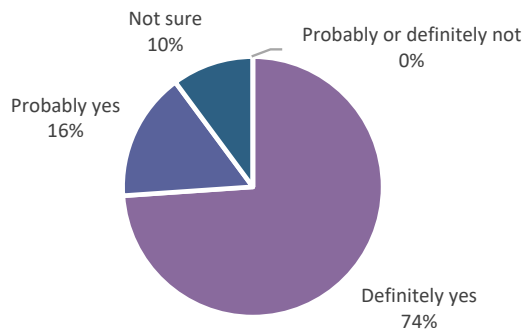

**B**

Reasons to receive results

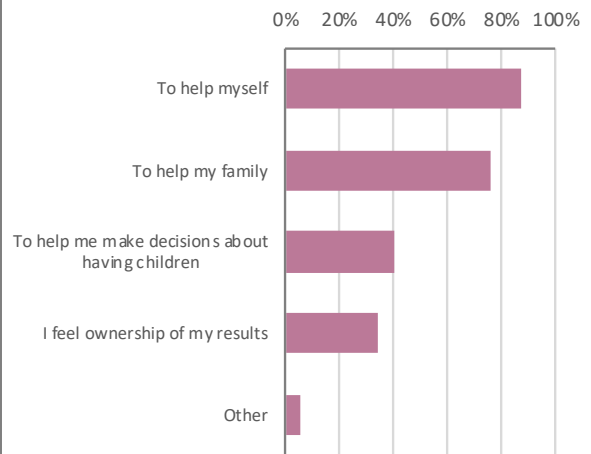

**C**

Types of results you would want to receive

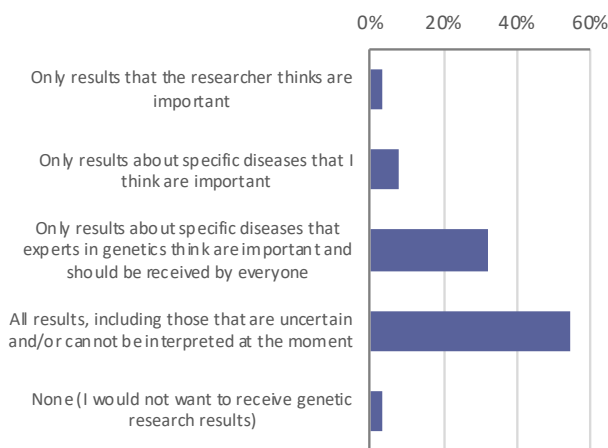

Reasons to not receive results

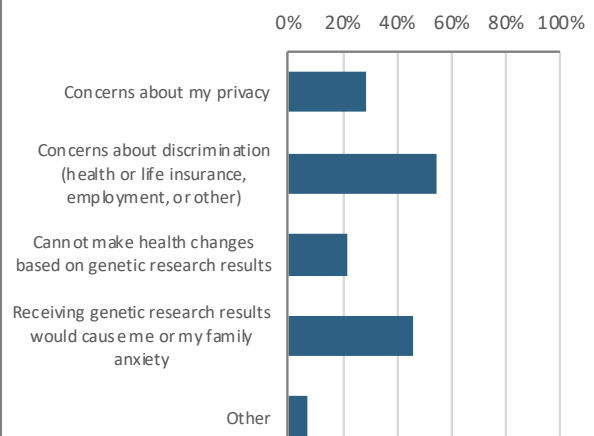

**Supplementary Figure 2. Pre-pilot survey to understand BioMe participants' (N = 72) preferences regarding the hypothetical return of results. A)** Decision to enroll into biobank research if the program returned genomic results. **B)** Selected reasons for receiving or not receiving genomic results. **C)** Selected categories of genomic results participants would want to receive.
